# Supplementary material for: Regulating Li nucleation/deposition by bamboo-shoot like lithiophilic particles anchored on carbon cloth for a dendrite-free lithium metal anode
Source: Royal Society of Chemistry journal article supplement (doi:10.1039/d2qm00888b), 2022-11-21
Supplement: d2qm00888b1.pdf [file d2qm00888b1.pdf]

## Regulating Li Nucleation/Deposition by Bamboo-shoot Like Lithiophilic Particles Anchored on Carbon Cloth for Dendrite-free Lithium Metal Anode

Yuchi Liu,<sup>a,b</sup> Zhicui Song,<sup>a,b</sup> Zihao Wang,<sup>a,b</sup> Jianxiong Xing,<sup>a,b</sup> Wei Zou,<sup>c</sup> and Jingze Li<sup>\*a,b</sup>

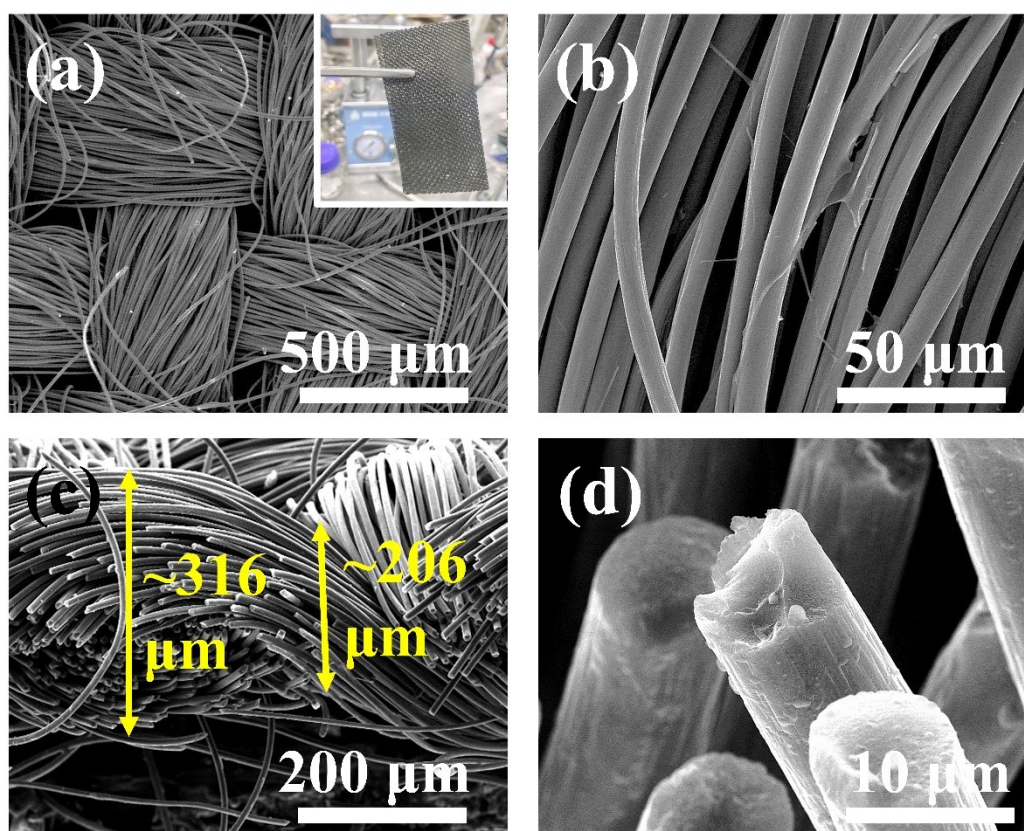

**Fig. S1** (a and b) Surface morphology of CC (carbon cloth). (c and d) Side-view morphology of CC.

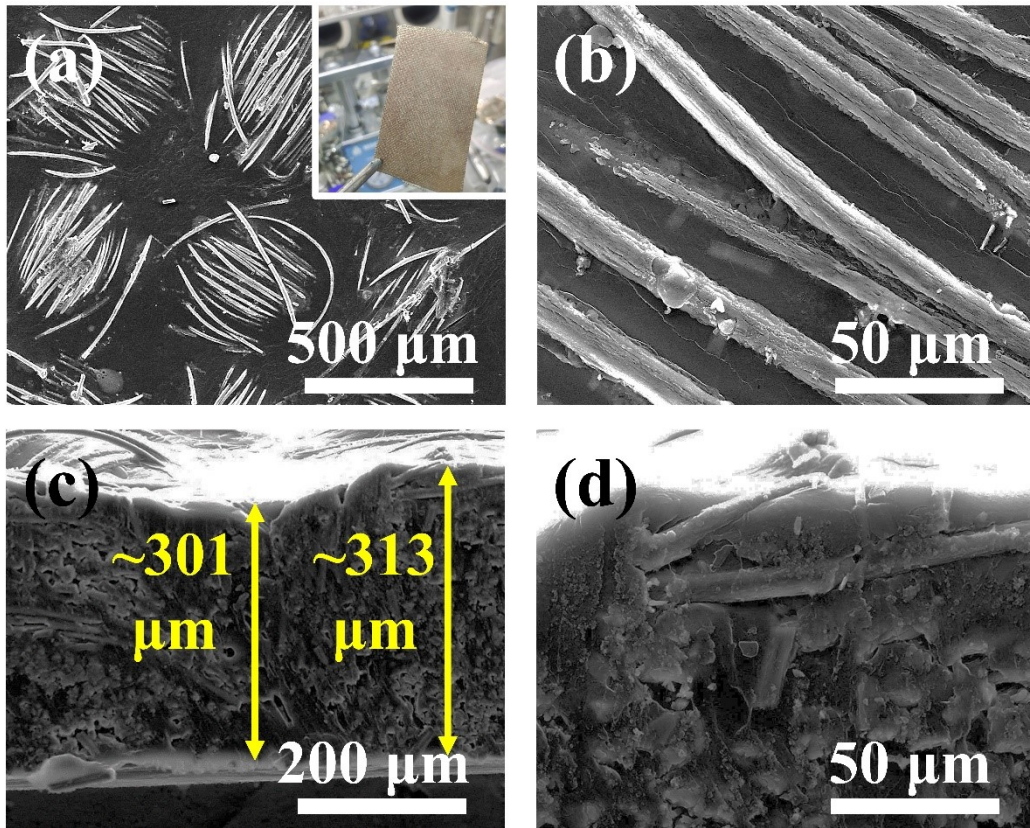

**Fig. S2** (a and b) Surface morphology of Li@CC. (c and d) Side-view morphology of Li@CC.

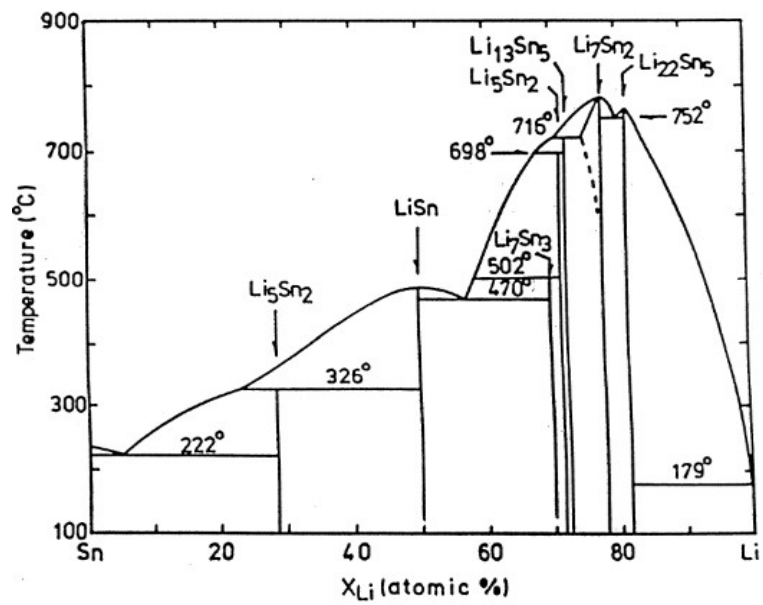

**Fig. S3** Li-Sn diagram<sup>1</sup>.

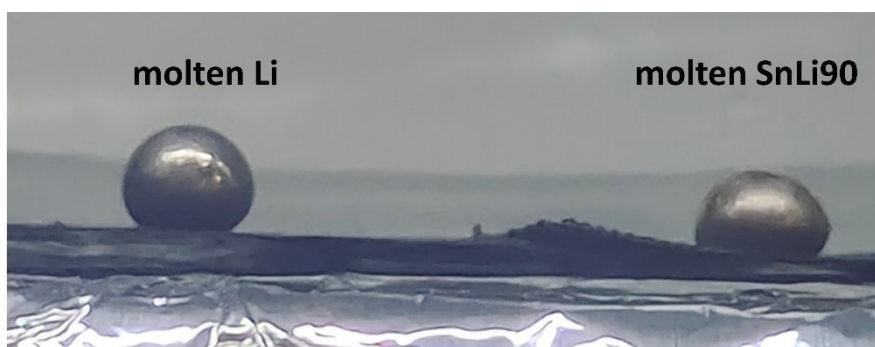

**Fig. S4** Wettability of molten Li and SnLi90 alloy on CC substrates.

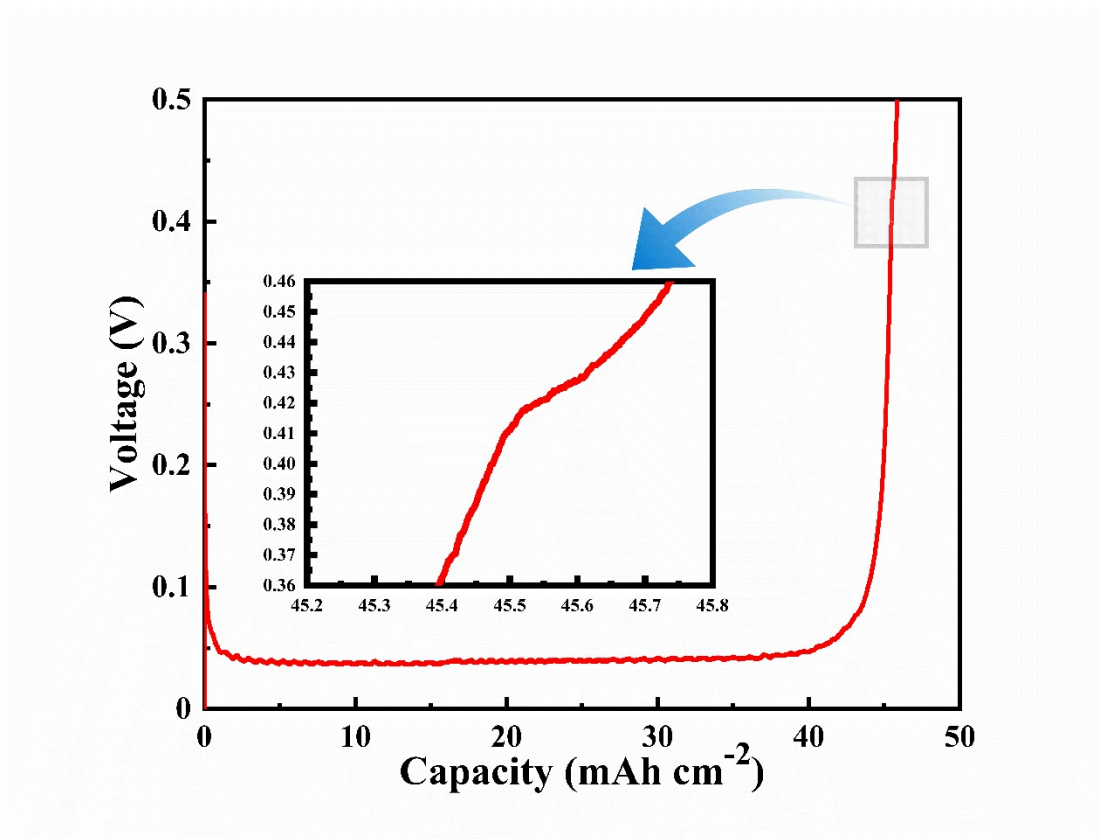

**Fig. S5** Capacity-voltage curve of SnLi@CC delithiated to 0.5 V.

**Table S1** Theoretical areal capacity and practical areal capacity of SnLi@CC

| Materials | Mass (g) | Minus the mass of CC (g) | Theoretical capacity (mAh g <sup>-1</sup> ) | Theoretical areal capacity (mAh cm <sup>-2</sup> ) | Practical areal capacity (mAh cm <sup>-2</sup> ) |
|-----------|----------|--------------------------|---------------------------------------------|----------------------------------------------------|--------------------------------------------------|
| CC        | 0.0098   | /                        |                                             | /                                                  | /                                                |
| SnLi90    | /        | /                        | 3087                                        | /                                                  | /                                                |

|         |        |        |   |                                                                                                                 |       |
|---------|--------|--------|---|-----------------------------------------------------------------------------------------------------------------|-------|
| SnLi@CC | 0.0214 | 0.0116 | / | 45.62<br>( $3087 \text{ mAh g}^{-1} \times 0.0116 \text{ g} / 0.785 \text{ cm}^2 = 45.62 \text{ mAh cm}^{-2}$ ) | 45.52 |
|---------|--------|--------|---|-----------------------------------------------------------------------------------------------------------------|-------|

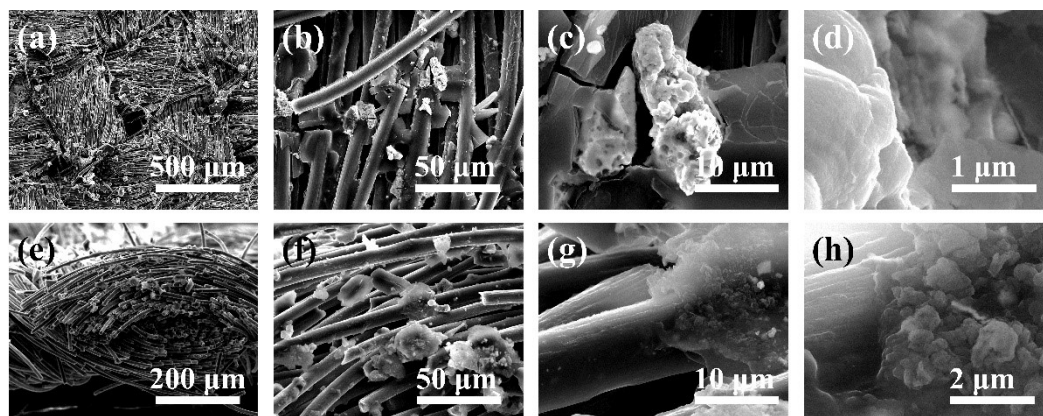

**Fig. S6** Morphology of SnLi@CC after completely delithiation by reacting with H<sub>2</sub>O, (a, b, c and d) Top-view morphology. (e, f, g and h) Side-view morphology.

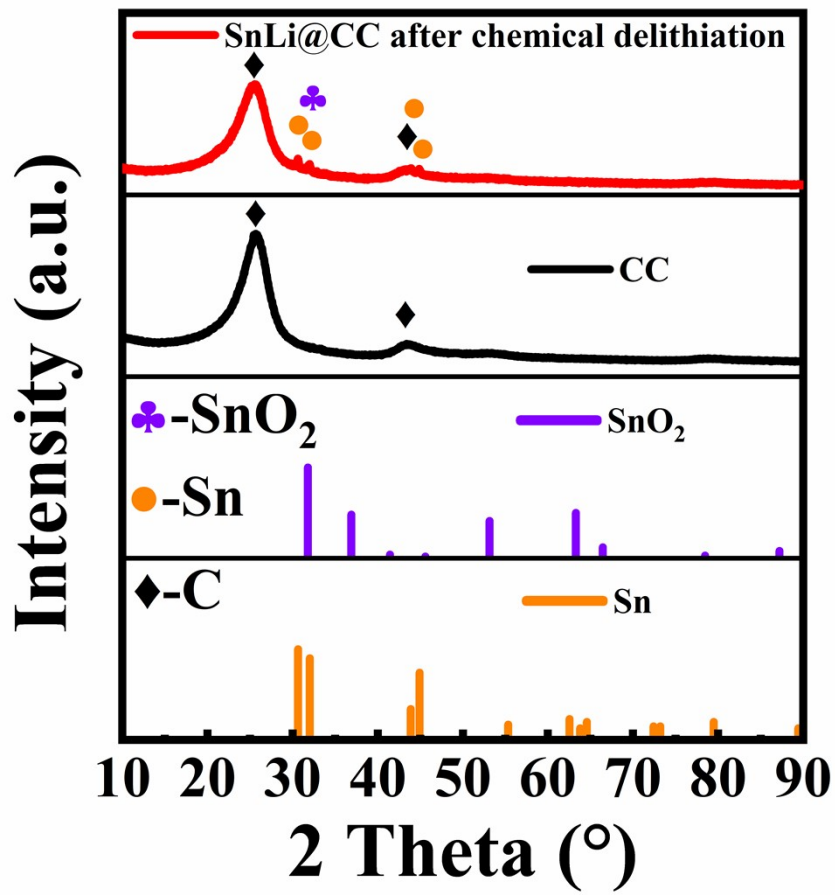

Fig. S7 XRD profiles of SnLi@CC after chemical delithiation by reaction with water.

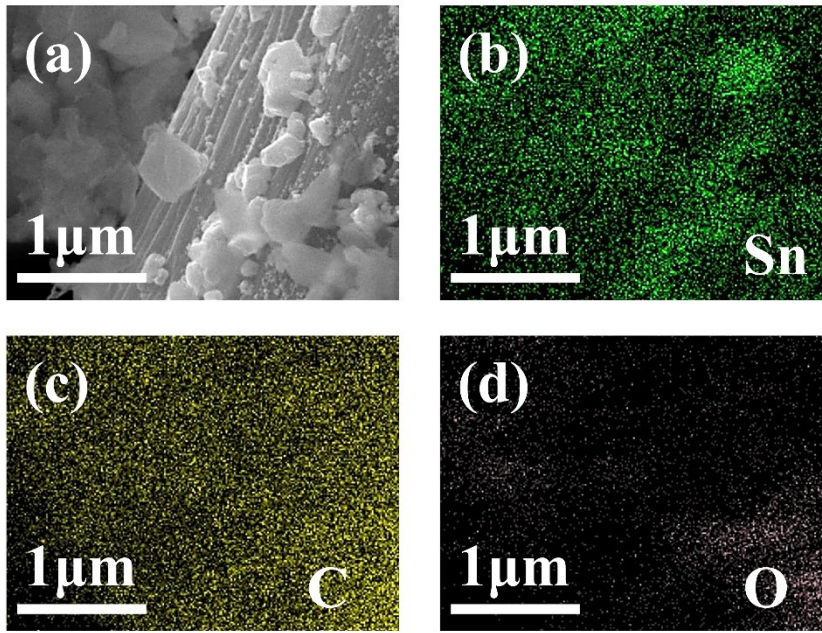

**Fig. S8** EDS test of SnLi@CC after chemical delithiation by reaction with water, (a) morphology of SnLi@CC after chemical delithiation by reaction with water. (b) Sn element. (c) C element. (d) O element.

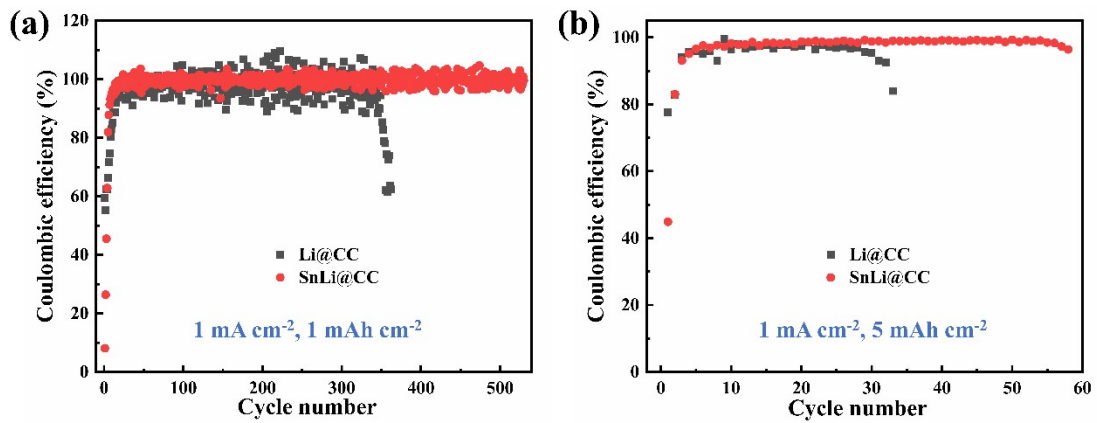

**Fig. S9** Coulombic efficiency of the skeleton obtained by chemical delithiation, (a)  $1 \text{ mA cm}^{-2}$ ,  $1 \text{ mAh cm}^{-2}$ ; (a)  $1 \text{ mA cm}^{-2}$ ,  $5 \text{ mAh cm}^{-2}$ .

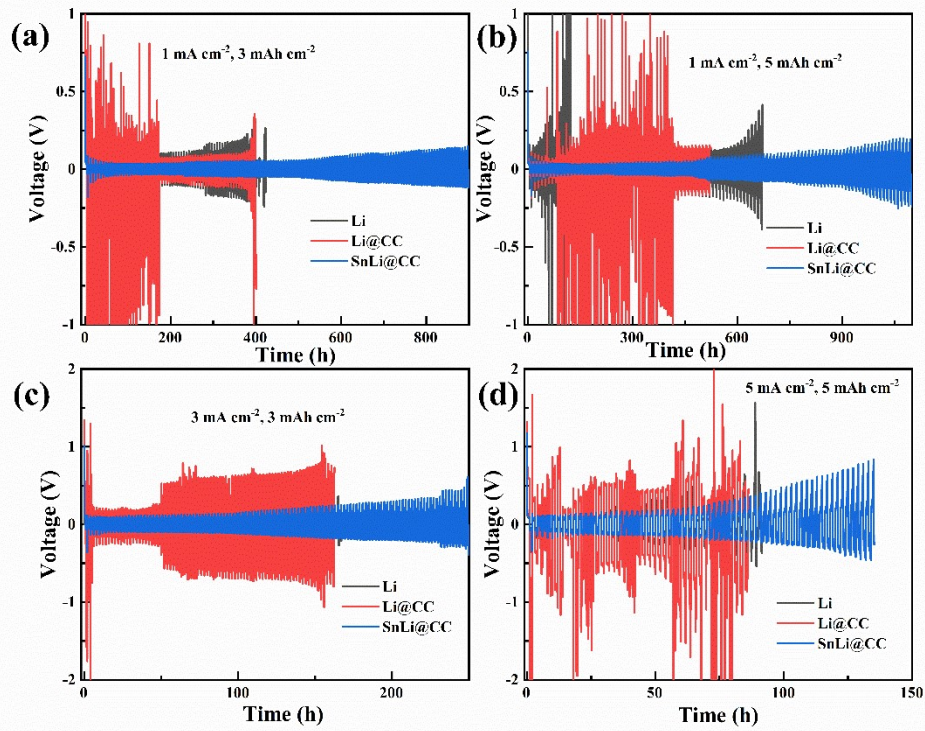

**Fig. S10** Time-voltage curves for Li, Li@CC and SnLi@CC symmetric batteries at different current densities and capacities, respectively. (a)  $1 \text{ mA cm}^{-2}$ ,  $3 \text{ mAh cm}^{-2}$ . (b)  $1 \text{ mA cm}^{-2}$ ,  $5 \text{ mAh cm}^{-2}$ . (c)  $3 \text{ mA cm}^{-2}$ ,  $1 \text{ mAh cm}^{-2}$ . (d)  $5 \text{ mA cm}^{-2}$ ,  $5 \text{ mAh cm}^{-2}$ .

## References

- 1 R. A. Huggins, Lithium alloy negative electrodes, *Journal of Power Sources*, 1999, **81**, 13-19.
